# Supplementary material for: Mate availability does not influence mating strategies in males of the sexually cannibalistic spider Argiope bruennichi
Source: PeerJ. 2018 Aug 7;6:e5360. doi: 10.7717/peerj.5360 (PMC6086085; doi:10.7717/peerj.5360)
Supplement: Supplemental Information 1 [file peerj-06-5360-s001.xlsx]

## Sheet: Mate availability
test_no	mate_availability	male_eggsac_id	male_id	male_leg_length_cm	male_adultweight_mg	male_testweight_mg	male_adultdate	male_adultage	female_id	female_eggsac_id	female_leg_length_cm	female_adultweight_mg	female_testweight_mg	female_residual_condition	female_adultdate	female_adultage	cannibalism	mating tactic_surviving_males	copulation_duration_s	contact_to_subadult_female	female_position_arena	test_day	first_male_movement_s	reintroduction_after_45min
V68	high-availability	161	1526	3.9225	14.9	14.4	01.08.2016	8	1255	182	7.889	155.4	237.4	-32.4605	04.08.2016	5	no	monogyny	10.92	NA	back	08.08.2016	22	no
V85	high-availability	141	1564	4.0925	16.1	12.8	02.08.2016	10	1641	101	5.227	60	72.8	18.2188	07.08.2016	5	no	bigyny	15.63	NA	back	11.08.2016	25	no
V134	high-availability	116	1822	4.188	16.3	14.2	14.08.2016	8	1814	161	7.576	147	295	50.4522	15.08.2016	7	yes	NA	7.4	NA	front	21.08.2016	19	no
V84	high-availability	134	1554	4.2495	17.6	14.4	30.07.2016	13	1698	105	5.9155	69.3	75.7	-34.561	07.08.2016	5	yes	NA	15.47	NA	back	11.08.2016	31	no
V48	high-availability	150	1520	4.261	16.9	15	28.07.2016	8	1268	133	8.2095	161.7	315.7	19.9203	28.07.2016	8	yes	NA	7.27	NA	front	04.08.2016	290	no
V80	high-availability	150	1489	4.2755	17.9	15.9	27.07.2016	15	1628	132	5.422	69.1	76.4	6.04895	05.08.2016	6	no	bigyny	10.67	NA	back	10.08.2016	204	no
V41	high-availability	168	1454	4.291	21.6	17.6	26.07.2016	10	1196	147	8.104	154.9	252.4	-34.8478	27.07.2016	9	yes	NA	30.08	NA	front	04.08.2016	32	no
V117	high-availability	137	1722	4.401	17.5	15.4	09.08.2016	8	1699	147	5.9735	70.5	146.1	31.1484	08.08.2016	9	yes	NA	10.03	NA	left	16.08.2016	29	no
V66	high-availability	112	1571	4.453	19	17.6	03.08.2016	6	1570	111	7.7065	142.3	248.4	-6.70149	02.08.2016	7	yes	NA	8.46	NA	right	08.08.2016	99	no
V21	high-availability	127	1428	4.54	19.1	18.7	21.07.2016	6	1027	105	8.1835	160.3	337.9	44.2229	20.07.2016	7	yes	NA	8.67	NA	back	26.07.2016	199	no
V96	high-availability	112	1586	4.582	20.4	19.9	03.08.2016	10	1637	132	7.0875	131.5	176.9	-28.1422	09.08.2016	4	no	monogyny	6.83	NA	front	12.08.2016	98	no
V10	high-availability	135	1270	4.775	22.2	19.6	12.07.2016	10	1035	111	8.578	227.2	318.5	-7.08081	17.07.2016	5	yes	NA	3.86	NA	right	21.07.2016	2227	no
V116	high-availability	149	1727	4.872	25.3	17.1	10.08.2016	7	1639	158	6.907	113.5	232.8	42.3551	10.08.2016	7	yes	NA	9	NA	front	16.08.2016	27	no
V95	high-availability	135	1588	4.974	22.2	22.5	03.08.2016	10	1202	147	8.2935	176.3	249.6	-52.9729	07.08.2016	6	yes	NA	14.24	NA	right	12.08.2016	471	no
V6	high-availability	147	1233	5.09	26.6	24	06.07.2016	15	1024	105	8.4065	216.3	363.3	51.5886	16.07.2016	5	yes	NA	7.03	NA	left	20.07.2016	12	no
V125	high-availability	131	1740	5.098	25.7	25.5	10.08.2016	9	1697	124	7.146	112.8	187.7	-22.0731	11.08.2016	8	yes	NA	113.4	NA	front	18.08.2016	239	no
V18	high-availability	131	1409	5.305	28.7	26.4	19.07.2016	5	1103	105	8.1245	177.9	207.9	-81.0057	19.07.2016	5	yes	NA	6.78	NA	front	23.07.2016	217	no
V1	high-availability	105	1212	5.595	38.5	30.7	07.07.2016	10	1014	147	8.7645	210.4	303	-37.6633	11.07.2016	6	yes	NA	13.12	NA	left	16.07.2016	14	no
V33	high-availability	105	1448	5.878	40.7	33.6	26.07.2016	10	1222	111	8.6885	228.7	324	-10.5171	26.07.2016	10	yes	NA	6.71	NA	front	04.08.2016	20	no
V12	high-availability	104	1407	NA	27.2	22.8	16.07.2016	6	1210	105	6.1995	87.2	114.7	-18.5285	17.07.2016	5	no	bigyny	7	NA	front	21.07.2016	12	no
V109	high-availability	132	1737	NA	16.2	16.2	10.08.2016	5	1623	133	8.429	167.9	366.3	52.769	09.08.2016	6	no	monogyny	19.54	NA	front	14.08.2016	76	no
V54	high-availability	141	1543	3.874	14.1	12.5	01.08.2016	6	1266	153	7.812	142.7	161.1	-102.533	02.08.2016	5	no	monogyny	9.44	NA	front	06.08.2016	171	yes
V122	high-availability	132	1756	4.166	19.3	15.2	11.08.2016	7	1733	104	6.4875	82.6	227.2	70.6806	10.08.2016	8	no	bigyny	5.93	NA	left	17.08.2016	7	yes
V130	high-availability	131	1835	4.583	18.4	17.9	12.08.2016	9	1876	134	6.061	77.6	138	15.9722	15.08.2016	6	no	bigyny	8.25	NA	right	20.08.2016	693	yes
V16	high-availability	149	1091	5.6	31.8	29.7	12.07.2016	11	1277	130	7.0595	105.8	161.3	-41.4778	19.07.2016	4	yes	NA	6.89	NA	front	22.07.2016	0	yes
V38	low-availability	135	1488	3.492	13.5	11.9	27.07.2016	9	1269	153	7.262	104.8	169	-50.1542	27.07.2016	9	yes	NA	4.55	no	front	04.08.2016	1875	no
V88	low-availability	137	1608	3.624	13.4	13.3	04.08.2016	9	1711	135	6.1055	91.3	122.1	-3.52657	08.08.2016	5	yes	NA	11.89	no	front	12.08.2016	359	no
V126	low-availability	132	1758	3.854	16.9	14.4	11.08.2016	8	1292	182	5.993	79.3	138.3	21.7714	10.08.2016	9	yes	NA	10.87	no	front	18.08.2016	20	no
V30	low-availability	104	1492	4.146	16.2	13.1	27.07.2016	9	1533	134	7.44	125.6	193.3	-40.2493	01.08.2016	4	no	monogyny	6.16	no	front	04.08.2016	723	no
V20	low-availability	161	1425	4.387	17.9	15.7	21.07.2016	6	1174	147	8.197	264.9	395.9	101.131	22.07.2016	5	yes	NA	7.3	yes	front	26.07.2016	1528	no
V51	low-availability	113	1525	4.394	18	15.6	28.07.2016	9	1225	153	7.5475	119	319.7	77.457	27.07.2016	10	no	monogyny	6.65	no	front	05.08.2016	1018	no
V77	low-availability	161	1529	4.587	18.5	18.3	01.08.2016	10	1629	111	6.392	92.8	120.3	-28.4962	05.08.2016	6	no	monogyny	13.65	no	front	10.08.2016	158	no
V47	low-availability	131	1518	4.606	18.8	17.1	27.07.2016	10	1288	111	9.0595	242.2	231.3	-133.22	03.08.2016	3	yes	NA	11.53	no	front	05.08.2016	420	no
V127	low-availability	140	1738	4.764	21.8	20.7	10.08.2016	9	1096	149	7.096	136.4	236.8	31.0704	09.08.2016	10	yes	NA	7.03	no	front	18.08.2016	27	no
V98	low-availability	131	1601	4.978	23.8	23.5	04.08.2016	10	1683	137	6.8085	122.6	219.8	37.3209	08.08.2016	6	no	monogyny	10.01	no	front	13.08.2016	7	no
V2	low-availability	149	1217	5.274	35.2	29.8	07.07.2016	10	1063	135	8.888	227.2	321.4	-29.2509	12.07.2016	5	yes	NA	8.97	no	front	16.07.2016	5	no
V3	low-availability	105	1172	5.287	33.1	28.1	08.07.2016	9	1058	111	9.949	321.3	406.7	-29.7553	13.07.2016	4	no	bigyny	10.78	no	front	16.07.2016	358	no
V19	low-availability	105	1171	6.583	50.1	38.5	12.07.2016	12	1111	135	9.338	251.1	429.2	42.157	18.07.2016	6	yes	NA	8.1	yes	front	23.07.2016	282	no
V70	low-availability	147	1449	NA	20.1	14.3	26.07.2016	14	1592	118	6.603	89.7	121.7	-44.16	03.08.2016	6	no	bigyny	11.43	no	front	08.08.2016	183	no
V52	low-availability	135	1540	3.692	13.9	12.5	01.08.2016	6	1158	112	8.6725	197.8	311.9	-21.3231	26.07.2016	12	no	monogyny	10.91	no	front	06.08.2016	780	yes
V99	low-availability	130	1618	3.872	13.9	11.4	04.08.2016	10	1695	132	6.0085	67.3	110.3	-7.48206	10.08.2016	4	no	monogyny	2.13	no	front	13.08.2016	266	yes
V119	low-availability	129	1775	4.03	15.5	11.5	11.08.2016	7	1622	130	6.669	90.7	148.7	-22.4975	09.08.2016	9	yes	NA	6.03	yes	front	17.08.2016	442	yes
V123	low-availability	129	1777	4.244	18.2	14.4	11.08.2016	7	1638	117	7.111	117.7	209.4	2.45736	11.08.2016	7	yes	NA	7.13	no	front	17.08.2016	29	yes
V53	low-availability	130	1539	4.415	18.9	17	01.08.2016	6	1101	105	8.5605	216.9	517.2	193.034	27.07.2016	11	no	monogyny	7.43	yes	front	06.08.2016	29	yes
V76	low-availability	147	1566	4.755	22.3	19	02.08.2016	8	1235	111	8.037	150.9	244.6	-37.2294	03.08.2016	7	no	monogyny	7.53	yes	front	09.08.2016	19	yes
V13	low-availability	149	1098	4.804	22	22.2	17.07.2016	6	1117	112	7.918	144.5	292.2	19.9942	17.07.2016	6	yes	NA	5.15	no	front	22.07.2016	142	yes
V132	low-availability	131	1783	4.8065	22.1	19	12.08.2016	9	1863	113	6.007	65.8	93.3	-24.3607	15.08.2016	6	yes	NA	7.48	no	front	20.08.2016	215	yes
V90	low-availability	140	1590	5.26	27.3	21.9	03.08.2016	10	1636	137	7.634	138	171.3	-77.9383	07.08.2016	6	yes	NA	10.6	yes	front	12.08.2016	38	yes
V14	low-availability	105	1265	5.711	37.1	31.8	17.07.2016	6	1090	149	8.579	199.8	378	52.3383	17.07.2016	6	yes	NA	5.37	no	front	22.07.2016	1616	yes
V17	low-availability	111	1153	NA	58.7	48.7	08.07.2016	15	1023	105	8.2555	222.8	377.6	78.1002	18.07.2016	5	yes	NA	3.57	yes	front	22.07.2016	609	yes
